# Supplementary material
Source: PubMed Central journal article supplement (PMC2567900)
Supplement: jlb.1107742_1.pdf [file jlb.1107742_1.pdf]

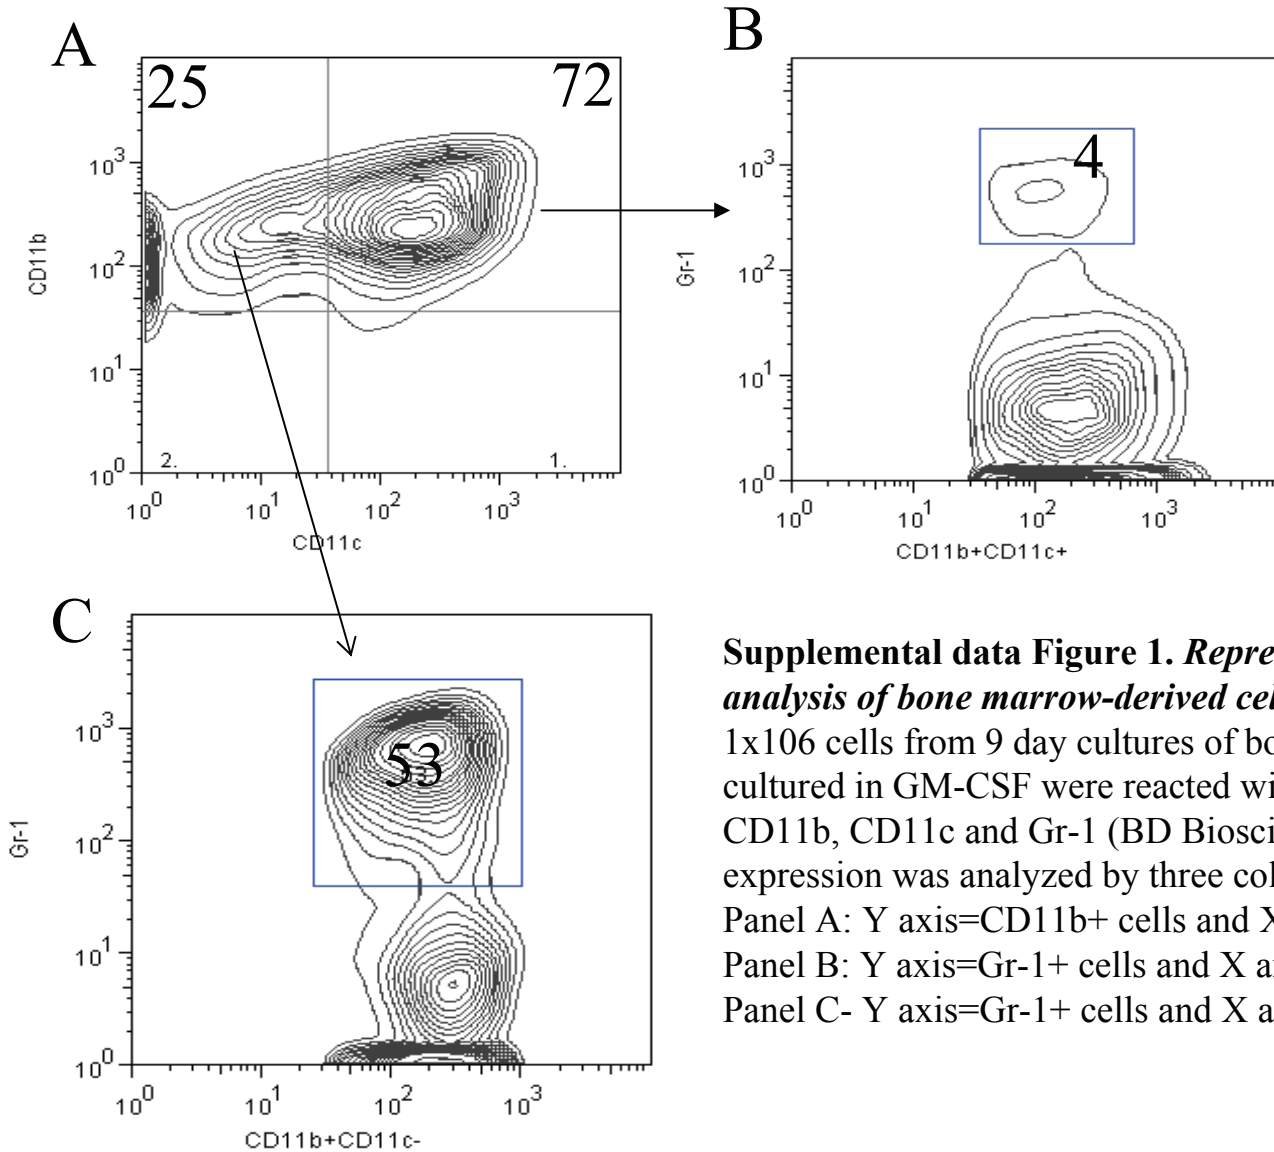

**Supplemental data Figure 1. Representative FACS analysis of bone marrow-derived cells cultured in GMCSF.**

1x10<sup>6</sup> cells from 9 day cultures of bone marrow cells cultured in GM-CSF were reacted with antibodies against CD11b, CD11c and Gr-1 (BD Biosciences) and cell surface expression was analyzed by three color flow cytometry.

Panel A: Y axis=CD11b+ cells and X axis= CD11c+ cells;  
 Panel B: Y axis=Gr-1+ cells and X axis= CD11b+c+ cells;  
 Panel C- Y axis=Gr-1+ cells and X axis= CD11b+c- cells.

**Supplemental Data -Table 1.** cDNA preparation and microarray analysis was performed as described in Materials and Methods. Changes in gene expression are represented as the ratio of signal intensities of infected macrophages to uninfected macrophages. Numbers represent gene expression changes from three separate experiments.

**Supplemental Data -Table 2.** cDNA preparation and microarray analysis was performed as described in Materials and Methods. Changes in gene expression are represented as the ratio of signal intensities of infected dendritic cells to uninfected dendritic cells. Numbers represent gene expression changes from three separate experiments.
